# Supplementary material for: Translation and validation of the Bahasa Malaysia version of the Nasal Obstruction Symptom Evaluation scale (M-NOSE)
Source: PeerJ journal article supplement (doi:10.7717/peerj.17825), 2024-08-01
Supplement: NOSEScale.pdf [file NOSEScale.pdf]

The NOSE Scale © 2003, the American Academy of Otolaryngology–Head and Neck Surgery Foundation.)

© 2024 American Academy of Otolaryngology—Head and Neck Surgery Foundation

Contact Us

1650 Diagonal Rd

Alexandria VA 22314

1-703-836-4444

Webpage: <https://www.entnet.org/resource/facial-plastics-rhinology-outcome-tool-nose-scale/>

The NOSE scale is free to use, as indicated on the website, but you must cite the original study where it was published.

ALL RESOURCES

## Facial Plastics/Rhinology Outcome Tool: NOSE Scale

APRIL 16, 2021

### Description

Disease-specific health status instrument for use in patients with nasal obstruction

### Targeted Age

Adults

### Items (Domains)

5 (N/A)

### Estimated Completion Time

5 minutes

### Reliability/Validity Assessment

Yes/Yes

**This study was funded by the AAO-HNS/F. If others wish to use the tool, there is no cost, we simply ask that you reference the study.**

### Literature

1) Stewart MG, Witsell DL, Smith TL, Weaver EM, Yueh B, Hannley MT. Development and validation of the Nasal Obstruction Symptom Evaluation (NOSE) scale. Otolaryngol Head Neck Surg. 2004;130:157-63.

## Related Content

**Rhinology Outcome Tool: RSOM-31**  
RESEARCH OUTCOME TOOLS

**Rhinology Outcome Tool: RSUI**  
RESEARCH OUTCOME TOOLS

**Rhinology Outcome Tool: SN-1**  
RESEARCH OUTCOME TOOLS
