# Supplementary material for: Translation and validation of the Bahasa Malaysia version of the Nasal Obstruction Symptom Evaluation scale (M-NOSE)
Source: PeerJ. 2024 Aug 1;12:e17825. doi: 10.7717/peerj.17825 (PMC11298164; doi:10.7717/peerj.17825)
Supplement: Supplemental Information 3 [file peerj-12-17825-s003.xlsx]

## Sheet: Sheet1
	ID	Age	Gender	Ethnicity	Group	Q1_1st response	Q2_1st response	Q3_1st response	Q4_1st response	Q5_1st response	Score_1st response	TotalScorex5_1st response	Q1_2nd response	Q2_2nd response	Q3_2nd response	Q4_2nd response	Q5_2nd response	Q1_postoperation	Q2_postoperation	Q3_postoperation	Q4_postoperation	Q5_postoperation	VAS_preoperation	VAS_postoperation
	1	20	M	M	1	4	4	4	3	3	18	90	3	3	3	3	3	1	2	2	1	2	9	7
	2	33	M	M	1	2	2	3	4	4	15	75	2	2	3	4	4	1	1	0	0	0	9	3
	3	27	M	M	1	3	3	3	3	3	15	75	3	3	3	3	3	0	0	0	0	0	8	5
	4	26	F	M	1	3	3	3	2	4	15	80	3	3	3	2	4	1	0	0	0	1	9	1
	5	25	F	M	1	3	3	3	3	4	16	80	3	3	3	3	3	1	1	1	1	1	9	3
	6	37	M	M	1	3	3	3	3	3	15	75	3	2	2	3	2	0	1	1	0	1	6	2
	7	22	M	M	1	2	3	3	2	3	13	65	2	3	3	3	3	0	0	0	0	0	10	2
	8	20	F	M	1	3	3	3	3	2	14	70	3	3	3	3	2	1	1	1	1	0	7	2
	9	29	M	M	1	3	3	3	3	3	15	75	3	3	3	2	2	1	1	1	1	1	8	4
	10	21	M	M	1	3	3	3	1	2	12	60	2	2	2	1	2	0	1	0	0	1	8	0
	11	40	M	M	1	3	3	3	2	2	13	65	3	3	3	2	3	1	1	0	0	0	9	8
	12	36	M	M	1	2	2	2	2	2	10	50	2	2	2	2	2	1	1	1	1	1	7	2
	13	34	M	M	1	3	3	3	2	2	13	65	2	2	2	2	2	1	2	1	0	0	9	3
	14	39	F	M	1	4	4	3	3	2	16	80	3	3	3	2	1	1	0	0	0	0	10	3
	15	43	M	M	1	4	4	4	4	4	20	100	4	4	4	4	4	0	1	1	0	1	9	2
	16	39	F	M	1	2	3	3	3	3	14	70	3	3	3	3	3	0	1	1	0	1	8	0
	17	24	M	M	1	4	4	3	4	3	18	90	4	4	3	4	3	0	0	0	0	0	9	4
	18	59	M	M	1	3	3	4	2	2	14	70	2	3	3	2	2	1	1	1	1	1	5	5
	19	42	F	M	1	4	4	4	4	4	20	100	4	4	4	4	4	2	2	2	2	3	10	5
	20	26	F	M	1	3	3	3	4	3	16	80	3	3	2	3	2	0	0	0	0	0	7	1
	21	55	M	M	1	2	2	2	1	1	8	40	2	2	2	1	1	0	0	0	0	0	8	1
	22	34	M	M	1	4	4	3	3	3	17	85	3	3	2	3	2	0	0	0	0	0	8	2
	23	26	M	M	1	1	4	4	4	2	15	75	3	3	2	2	2	0	0	0	0	0	8	7
	24	53	F	M	1	3	3	3	2	3	14	70	3	3	3	2	3	0	0	0	0	0	7	1
	25	18	M	M	1	3	4	3	2	3	15	75	1	2	2	1	2	0	1	0	0	0	8	2
	26	34	F	M	1	4	3	2	2	1	12	60	2	3	3	2	2	2	2	1	1	1	8	3
	27	59	M	M	1	2	3	3	2	2	12	60	2	3	3	2	2	1	0	0	0	0	7	1
	28	41	M	M	1	2	2	3	3	2	12	60	2	2	2	3	2	1	1	2	1	1	8	3
	29	22	M	M	1	3	3	4	2	2	14	70	2	3	3	2	3	1	2	2	1	1	9	5
	30	29	F	M	1	3	3	3	3	3	15	75	2	3	2	1	3	3	2	2	1	2	9	1
	31	44	M	M	1	3	3	3	3	3	15	75	2	3	2	2	3	0	0	0	0	0	9	1
	32	24	M	M	1	3	4	4	3	4	18	90	3	4	4	3	4	3	3	3	2	2	10	1
	33	29	M	M	1	4	4	4	3	3	18	90	4	4	4	3	3	3	3	3	2	3	10	3
	34	46	F	M	1	0	3	3	2	2	10	50	0	2	2	2	2	0	1	0	0	0	6	2
	35	31	M	M	1	2	3	2	2	2	11	55	2	2	2	2	3	0	1	0	0	1	5	1
	36	51	F	M	1	3	3	3	3	3	15	75	3	3	3	3	3	2	2	3	2	2	8	2
	37	46	F	M	1	3	3	3	3	3	15	75	3	3	3	3	3	2	2	2	2	2	8	3
	38	42	M	M	1	4	4	4	4	4	20	100	4	4	4	4	4	1	0	0	0	0	8	4
	39	33	M	M	1	4	4	4	4	4	20	100	4	4	4	4	4	2	2	2	2	2	9	3
	40	41	M	M	1	3	4	3	3	3	16	80	3	4	4	3	3	2	2	1	1	1	9	1
	41	25	M	M	1	3	3	4	4	4	18	90	3	3	3	3	3	0	1	1	0	1	9	3
	42	25	F	M	1	0	3	2	2	2	9	45	2	3	2	2	2	1	1	0	0	1	2	1
	43	28	M	M	1	4	3	3	4	3	17	85	4	3	3	4	3	1	1	0	0	0	7	3
	44	18	F	M	1	2	2	2	2	3	11	55	3	3	3	3	3	0	0	0	0	0	5	5
	45	21	F	M	1	3	3	3	3	3	15	75	3	3	3	3	3	0	0	0	0	0	8	1
	46	34	M	M	1	4	3	3	4	4	18	80	3	3	3	3	3	1	2	1	1	1	9	3
	47	20	M	M	1	1	2	2	3	3	11	55	1	2	2	2	3	1	1	1	1	1	8	4
	48	34	M	M	1	3	3	2	2	3	13	65	2	2	2	2	2	0	0	0	1	1	9	2
	49	30	M	M	1	3	3	3	4	4	17	85	2	2	2	4	3	1	1	1	1	1	9	5
	50	21	M	M	1	4	4	4	4	4	20	100	3	3	3	3	3	2	2	2	2	2	6	5
	51	55	M	M	1	3	2	2	2	2	11	70	2	2	2	2	2	1	1	0	0	0	4	4
	52	54	M	M	1	4	4	3	2	2	15	75	4	4	3	1	2	2	2	2	1	1	6	0
	53	32	F	M	1	3	3	2	2	1	11	55	3	3	2	2	2	1	1	1	0	1	9	2
	54	59	F	M	1	2	3	3	2	2	12	60	2	2	2	2	2	0	0	0	0	0	7	2
	55	26	F	M	1	4	4	4	3	4	19	95	4	4	4	3	4	0	1	0	1	1	7	2
	56	34	M	M	1	3	3	3	3	4	16	75	3	3	3	3	3	1	1	1	1	2	7	1
	57	38	M	M	1	3	4	3	4	4	18	90	2	2	2	3	3	2	2	2	2	2	9	5
	58	37	F	M	1	3	3	3	3	3	15	75	2	2	2	2	2	1	1	1	1	1	8	3
	59	51	M	M	1	2	2	2	2	2	10	50	1	2	2	2	2	1	1	1	1	1	9	1
	60	19	F	M	1	3	4	3	3	2	15	75	2	3	2	1	2	2	2	0	0	0	7	1
	61	24	F	M	1	3	3	4	4	4	18	90	2	3	2	3	4	0	0	1	1	0	8	1
	62	22	M	M	1	3	3	3	3	3	15	75	3	4	4	4	4	0	0	0	0	0	10	2
	63	31	M	M	1	2	3	2	1	2	10	50	4	4	4	4	4	1	1	1	1	1	7	3
	64	34	F	M	0	1	1	0	0	1	3	15
	65	33	F	M	0	0	0	0	0	0	0	0
	66	34	F	M	0	0	0	0	0	0	0	0
	67	35	F	M	0	0	0	0	0	0	0	0
	68	31	F	M	0	0	0	0	0	0	0	0
	69	33	F	M	0	0	0	0	0	0	0	0
	70	42	M	M	0	0	0	0	0	0	0	0
	71	30	F	M	0	0	0	0	0	0	0	0
	72	33	F	M	0	1	1	1	1	1	3	15
	73	32	F	M	0	0	0	0	0	0	0	0
	74	32	F	M	0	0	0	0	0	0	0	0
	75	40	F	M	0	0	0	0	0	0	0	0
	76	45	F	M	0	0	0	0	1	1	2	10
	77	48	M	M	0	0	0	0	0	0	0	0
	78	53	M	M	0	2	2	1	0	1	6	30
	79	43	F	M	0	0	0	0	0	0	0	0
	80	34	M	M	0	0	0	0	0	0	0	0
	81	26	F	M	0	0	0	0	0	0	0	0
	82	38	M	M	0	1	0	0	0	0	1	5
	83	26	F	M	0	1	1	0	0	0	2	10
	84	33	M	M	0	0	0	0	0	0	0	0
	85	26	M	M	0	1	0	0	0	0	1	5
	86	31	F	M	0	0	0	0	0	0	0	0
	87	32	M	M	0	0	1	0	0	0	1	5
	88	32	F	M	0	0	0	0	0	0	0	0
	89	31	F	M	0	0	0	0	0	0	0	0
	90	43	F	M	0	0	0	0	0	0	0	0
	91	45	M	C	0	2	1	0	0	0	3	15
	92	33	M	M	0	1	1	0	0	0	2	10
	93	35	F	I	0	1	1	0	0	0	2	10
	94	25	M	M	0	1	0	0	0	1	2	10
	95	59	M	M	0	1	0	0	0	0	1	5
	96	23	M	I	0	0	0	0	0	0	0	0
	97	34	M	M	0	0	1	0	0	0	1	5
	98	39	M	M	0	0	0	0	0	0	0	0
	99	36	F	M	0	0	0	0	0	0	0	0
	100	37	M	M	0	0	0	0	0	0	0	0
	101	40	F	M	0	0	0	0	0	0	0	0
	102	40	M	M	0	0	0	0	0	0	0	0
	103	33	M	M	0	0	0	1	0	1	2	10
	104	26	M	M	0	1	1	1	0	0	3	15
	105	30	M	M	0	0	0	0	0	0	0	0
	106	34	M	M	0	0	1	0	0	0	1	5
	107	41	F	M	0	0	0	0	0	0	0	0
	108	41	F	M	0	0	0	0	0	0	0	0
	109	40	F	M	0	0	0	0	1	0	1	5
	110	41	F	M	0	0	0	0	0	1	1	5
	111	38	F	M	0	0	0	0	0	0	0	0
	112	36	M	M	0	0	0	0	0	0	0	0
	113	34	F	M	0	1	1	0	0	0	2	10
	114	35	M	I	0	0	0	0	0	0	0	0
	115	35	M	I	0	0	0	0	0	0	0	0
	116	33	M	C	0	0	0	0	0	0	0	0
	117	34	M	C	0	0	0	0	0	0	0	0
	118	34	M	C	0	1	1	0	0	0	2	10
	119	34	M	I	0	1	2	2	0	0	5	25
	120	35	M	C	0	1	2	1	2	0	5	25
	121	33	F	C	0	0	0	0	0	0	0	0
	122	34	F	O	0	0	0	0	0	0	0	0
	123	37	F	I	0	1	1	1	1	1	5	25
	124	33	M	C	0	1	1	1	0	0	2	10
	125	60	M	M	0	0	0	0	0	0	0	0
	126	36	M	M	0	1	1	0	0	0	2	10
